# Supplementary material for: Lower All-Cause Mortality for Coronary Heart or Stroke Patients Who Adhere Better to Mediterranean Diet-An NHANES Analysis
Source: MDPI journal article supplement (doi:10.3390/nu14153203), 2022-08-05
Supplement: s1 [file s1]

Supplementary Materials

# Lower All-Cause Mortality for Coronary Heart or Stroke Patients Who Adhere Better to Mediterranean Diet-An NHANES Analysis

Kae-Woei Liang <sup>1,2,3,\*</sup>, Chia-Lin Lee <sup>2,3,4,5,6</sup> and Wei-Ju Liu <sup>4</sup>

**Table S1.** The Mediterranean diet food components with their respective adherence data to all-cause, cardiovascular and cancer mortality.

| Mortality              | N    | All-cause mortality | CV mortality | Cancer mortality |
|------------------------|------|---------------------|--------------|------------------|
| Alcohol (0)            | 1928 | 565 (26.45)         | 179 (8.62)   | 91 (4.16)        |
| Alcohol (1)            | 124  | 31 (22.01)          | 11 (6.28)    | 8 (6.85)         |
| missing                | 0    | 0                   | 6            | 6                |
| Red/processed meat (0) | 1011 | 289 (25.58)         | 93 (7.95)    | 57 (4.85)        |
| Red/processed meat (1) | 1041 | 307 (26.77)         | 97 (9.01)    | 42 (3.8)         |
| missing                | 0    | 0                   | 6            | 6                |
| Sea food (0)           | 1707 | 515 (27.27)         | 170 (9.24)   | 86 (4.51)        |
| Sea food (1)           | 345  | 81 (21.08)          | 20 (4.93)    | 13 (3.46)        |
| missing                | 0    | 0                   | 6            | 6                |
| Whole grains (0)       | 1034 | 299 (26.06)         | 93 (8.44)    | 58 (4.83)        |
| Whole grains (1)       | 1018 | 297 (26.29)         | 97 (8.52)    | 41 (3.82)        |
| missing                | 0    | 0                   | 6            | 6                |
| Legumes (0)            | 1450 | 402 (25.04)         | 130 (8.34)   | 71 (4.53)        |
| Legumes (1)            | 602  | 194 (28.97)         | 60 (8.83)    | 28 (3.83)        |
| missing                | 0    | 0                   | 6            | 6                |
| Nuts (0)               | 1417 | 419 (27.18)         | 133 (9)      | 68 (4.37)        |
| Nuts (1)               | 635  | 177 (24.26)         | 57 (7.48)    | 31 (4.24)        |
| missing                | 0    | 0                   | 6            | 6                |
| Fruits (0)             | 1005 | 250 (22.86)         | 90 (7.69)    | 42 (3.63)        |
| Fruits (1)             | 1047 | 346 (29.49)         | 100 (9.27)   | 57 (5.02)        |
| missing                | 0    | 0                   | 6            | 6                |
| Vegetables (0)         | 1055 | 333 (29.43)         | 106 (9.35)   | 57 (4.9)         |
| Vegetables (1)         | 997  | 263 (22.92)         | 84 (7.61)    | 42 (3.76)        |
| missing                | 0    | 0                   | 6            | 6                |
| MUFA/SFA (0)           | 978  | 282 (25.16)         | 98 (8.63)    | 50 (4.45)        |
| MUFA/SFA (1)           | 1074 | 314 (27.2)          | 92 (8.33)    | 49 (4.21)        |
| missing                | 0    | 0                   | 7            | 7                |

CV: cardiovascular; MUFA: monounsaturated fatty acid; SFA: saturated fatty acid.

Food component (0): alternative Mediterranean Diet Index (aMED) score gets 0.

Food component (1): aMED score gets 1.

Mortality data: N (weighted mortality rate %).
